# Supplementary material
Source: MDPI journal article supplement (https://www.mdpi.com/2220-9964/10/5/330)
Supplement: s1 [file s1]

|                                                                                                     | [14] | [56] | [125], [158] | [157] | [159] | [160] |
|-----------------------------------------------------------------------------------------------------|------|------|--------------|-------|-------|-------|
| Task ontologies                                                                                     | *    |      |              |       |       | *     |
| Ontology for modeling                                                                               | *    |      |              | *     |       |       |
| Ontology for encoding                                                                               | *    |      |              | *     |       |       |
| Lightweight ontologies                                                                              | *    |      |              |       |       |       |
| Application ontologies                                                                              | *    |      |              |       |       | *     |
| Ontology Design Pattern                                                                             | *    | *    | *            |       |       | *     |
| Spatio/Temporal/Semantics Reference Systems/Semantic Datum                                          | *    | *    | *            | *     |       | *     |
| Top-level ontologies                                                                                | *    | *    | *            |       |       | *     |
| Domain ontologies                                                                                   | *    | *    | *            |       |       | *     |
| (Geographic) Knowledge graph                                                                        | *    |      |              |       | *     |       |
| Geo-comparison/Semantic similarity measures                                                         | *    | *    | *            | *     |       | *     |
| Alignment, translation                                                                              | *    | *    | *            | *     |       |       |
| Sensor and observation ontologies                                                                   | *    |      | *            |       |       |       |
| Geographic Information Retrieval                                                                    | *    | *    | *            | *     |       | *     |
| Linked Geo Data/LOD/Linked Sensor Data                                                              | *    | *    | *            | *     | *     |       |
| Gazetteers (GeoNames)/temporal gazetteers                                                           | *    | *    | *            | *     |       |       |
| Spatial RDF & SPARQL                                                                                | *    | *    | *            |       |       |       |
| Ontology-based info extraction                                                                      | *    |      |              |       |       | *     |
| Semantic enrichment/tagging/annotation                                                              | *    | *    | *            |       |       | *     |
| Extraction of spatio-temporal info                                                                  | *    |      |              |       |       |       |
| Geoparsing                                                                                          | *    | *    | *            |       |       |       |
| Place-based Information Systems                                                                     | *    |      | *            |       |       |       |
| Thematic, spatial, and temporal perspectives                                                        |      |      | *            |       |       |       |
| Place location, identity, meaning                                                                   | *    | *    |              |       |       |       |
| Events, change discovery                                                                            | *    | *    | *            |       |       |       |
| Place-based GIS                                                                                     |      | *    |              |       |       |       |
| Qualitative reasoning                                                                               | *    | *    | *            | *     |       |       |
| Image schemas/Spatial cognitive schemas/Conceptual spaces                                           |      |      |              | *     |       | *     |
| Non-representational formalisms                                                                     |      |      |              |       |       | *     |
| Folksonomies                                                                                        |      |      |              | *     |       | *     |
| Knowledge representation languages (OWL)                                                            |      |      | *            |       |       |       |
| (Geo-)spatial statistics                                                                            |      |      | *            |       |       |       |
| Semantics-driven user interfaces/interaction paradigms/Semantic engineering of human communications |      |      | *            |       |       |       |
| Layered ontology engineering                                                                        |      |      | *            |       |       |       |
| Affordance-based approaches                                                                         |      |      |              | *     |       |       |
| Semantic markups for Web services                                                                   |      |      | *            |       |       |       |
